# Supplementary material
Source: ML conference proceedings conference paper supplement (https://proceedings.mlr.press/v97/bregere19a.html)
Supplement: Supplementary file 1 [file bregere19a-supp.pdf]

---

# Target Tracking for Contextual Bandits: Application to Demand Side Management

## Supplementary material

---

Margaux Brégère    Pierre Gaillard    Yannig Goude    Gilles Stoltz

We provide the proofs in order of appearance of the corresponding result:

- The proof of Lemma 1 in Appendix A
- The proof of Proposition 1 in Appendix B
- The proof of Lemma 2 in Appendix C
- The proof of Lemma 3 in Appendix D
- The proof of Theorem 2 in Appendix E

We also give more details on the numerical expression of the covariance matrix  $\Gamma$  built in the experiments (see Section 5.1) based on real data:

- Details on the covariance matrix  $\Gamma$  in Appendix F.

### A. Proof of Lemma 1

The proof below relies on Laplace’s method on supermartingales, which is a standard argument to provide confidence bounds on a self-normalized sum of conditionally centered random vectors. See Theorem 2 of [Abbasi-Yadkori et al. \(2011\)](#) or Theorem 20.2 in the monograph by [Lattimore & Szepesvári \(2018\)](#). Under Model 1 and given the definition of  $V_t$ , we have the rewriting

$$\begin{aligned}\widehat{\theta}_t &= V_t^{-1} \sum_{s=1}^t \phi(x_s, p_s) Y_{s,p_s} \\ &= V_t^{-1} \sum_{s=1}^t \phi(x_s, p_s) (\phi(x_s, p_s)^\top \theta + p_s^\top \varepsilon_s) \\ &= V_t^{-1} ((V_t - \lambda I_d) \theta + M_t) = \theta - \lambda V_t^{-1} \theta + V_t^{-1} M_t,\end{aligned}$$

where we introduced

$$M_t = \sum_{s=1}^t \phi(x_s, p_s) p_s^\top \varepsilon_s,$$

which is a martingale with respect to  $\mathcal{F}_t = \sigma(\varepsilon_1, \dots, \varepsilon_t)$ . Therefore, by a triangle inequality,

$$\begin{aligned}\|V_t^{1/2}(\widehat{\theta}_t - \theta)\| &= \|-\lambda V_t^{-1/2} \theta + V_t^{-1/2} M_t\| \\ &\leq \lambda \|V_t^{-1/2} \theta\| + \|V_t^{-1/2} M_t\|.\end{aligned}$$

On the one hand, given that all eigenvalues of the symmetric matrix  $V_t$  are larger than  $\lambda$  (given the  $\lambda I_d$  term in its definition), all eigenvalues of  $V_t^{-1/2}$  are smaller than  $1/\sqrt{\lambda}$  and thus,

$$\lambda \|V_t^{-1/2} \theta\| \leq \lambda \frac{1}{\sqrt{\lambda}} \|\theta\| = \sqrt{\lambda} \|\theta\|.$$

We now prove, on the other hand, that with probability at least  $1 - \delta$ ,

$$\|V_t^{-1/2} M_t\| \leq \rho \sqrt{2 \ln \frac{1}{\delta} + d \ln \frac{1}{\lambda} + \ln \det(V_t)},$$

which will conclude the proof of the lemma.

*Step 1: Introducing super-martingales.* For all  $\nu \in \mathbb{R}^d$ , we consider

$$S_{t,\nu} = \exp\left(\nu^\top M_t - \frac{\rho^2}{2} \nu^\top V_t \nu\right)$$

and now show that it is an  $\mathcal{F}_t$ -super-martingale. First, note that since the common distribution of the  $\varepsilon_1, \varepsilon_2, \dots$  is  $\rho$ -sub-Gaussian, then for all  $\mathcal{F}_{t-1}$ -measurable random vectors  $\nu_{t-1}$ ,

$$\mathbb{E}\left[e^{\nu_{t-1}^\top \varepsilon_t} \mid \mathcal{F}_{t-1}\right] \leq e^{\rho^2 \|\nu_{t-1}\|^2 / 2}. \quad (14)$$

Now,

$$S_{t,\nu} = S_{t-1,\nu} \exp\left(\nu^\top \phi(x_t, p_t) p_t^\top \varepsilon_t - \frac{\rho^2}{2} \nu^\top \phi(x_t, p_t) \phi(x_t, p_t)^\top \nu\right)$$

where, by using the sub-Gaussian assumption (14) and the fact that  $\sum_j p_{j,t}^2 \leq 1$  for all convex weight vectors  $p_t$ ,

$$\begin{aligned} \mathbb{E}\left[\exp(\nu^\top \phi(x_t, p_t) p_t^\top \varepsilon_t) \mid \mathcal{F}_{t-1}\right] &\leq \exp\left(\frac{\rho^2}{2} \nu^\top \phi(x_t, p_t) \underbrace{p_t^\top p_t}_{\leq 1} \phi(x_t, p_t)^\top \nu\right). \end{aligned}$$

This implies  $\mathbb{E}[S_{t,\nu} \mid \mathcal{F}_{t-1}] \leq S_{t-1,\nu}$ .

Note that the rewriting of  $S_{t,\nu}$  in its vertex form is, with  $m = V_t^{-1} M_t / \rho^2$ :

$$\begin{aligned} S_{t,\nu} &= \exp\left(\frac{1}{2}(\nu - m)^\top \rho^2 V_t (\nu - m) + \frac{1}{2} m^\top \rho^2 V_t m\right) \\ &= \exp\left(\frac{1}{2}(\nu - m)^\top \rho^2 V_t (\nu - m)\right) \\ &\quad \times \exp\left(\frac{1}{2\rho^2} \|V_t^{-1/2} M_t\|^2\right). \end{aligned}$$

*Step 2: Laplace's method—integrating  $S_{t,\nu}$  over  $\nu \in \mathbb{R}^d$ .* The basic observation behind this method is that (given the vertex form)  $S_{t,\nu}$  is maximal at  $\nu = m = V_t^{-1} M_t / \rho^2$  and then equals  $\exp(\|V_t^{-1/2} M_t\|^2 / (2\rho^2))$ , which is (a transformation of) the quantity to control. Now, because the exp function quickly vanishes, the integral over  $\nu \in \mathbb{R}^d$  is close to this maximum. We therefore consider

$$\bar{S}_t = \int_{\mathbb{R}^d} S_{t,\nu} d\nu.$$

We will make repeated uses of the fact that the Gaussian density functions,

$$\nu \mapsto \frac{1}{\sqrt{\det(2\pi C)}} \exp\left(-(\nu - m)^\top C^{-1}(\nu - m)\right),$$

where  $m \in \mathbb{R}^d$  and  $C$  is a (symmetric) positive-definite matrix, integrate to 1 over  $\mathbb{R}^d$ . This gives us first the rewriting

$$\bar{S}_t = \sqrt{\det(2\pi\rho^{-2}V_t^{-1})} \exp\left(\frac{1}{2\rho^2} \|V_t^{-1/2} M_t\|^2\right).$$

Second, by the Fubini-Tonelli theorem and the super-martingale property

$$\mathbb{E}[S_{t,\nu}] \leq \mathbb{E}[S_{0,\nu}] = \exp(-\lambda\rho^2 \|\nu\|^2 / 2),$$

we also have

$$\begin{aligned} \mathbb{E}[\bar{S}_t] &\leq \int_{\mathbb{R}^d} \exp(-\lambda\rho^2 \|\nu\|^2 / 2) d\nu \\ &= \sqrt{\det(2\pi\rho^{-2}\lambda^{-1}\mathbf{I}_d)}. \end{aligned}$$

Combining the two statements, we proved

$$\mathbb{E}\left[\exp\left(\frac{1}{2\rho^2} \|V_t^{-1/2} M_t\|^2\right)\right] \leq \sqrt{\frac{\det(V_t)}{\lambda^d}}.$$

*Step 3: Markov-Chernov bound.* For  $u > 0$ ,

$$\begin{aligned} \mathbb{P}\left[\|V_t^{-1/2} M_t\| > u\right] &= \mathbb{P}\left[\frac{1}{2\rho^2} \|V_t^{-1/2} M_t\|^2 > \frac{u^2}{2\rho^2}\right] \\ &\leq \exp\left(-\frac{u^2}{2\rho^2}\right) \mathbb{E}\left[\exp\left(\frac{1}{2\rho^2} \|V_t^{-1/2} M_t\|^2\right)\right] \\ &\leq \exp\left(-\frac{u^2}{2\rho^2} + \frac{1}{2} \ln \frac{\det(V_t)}{\lambda^d}\right) = \delta \end{aligned}$$

for the claimed choice

$$u = \rho \sqrt{2 \ln \frac{1}{\delta} + d \ln \frac{1}{\lambda} + \ln \det(V_t)}.$$

## B. Proof of Proposition 1

**Comment:** The main difference with the regret analysis of LinUCB provided by [Chu et al. \(2011\)](#) or [Lattimore & Szepesvári \(2018\)](#) is in the first part of *Step 1*, as we need to deal with slightly more complicated quantities: not just with linear quantities of the form  $\phi(x_t, p)^\top \theta$ . Steps 2 and 3 are easy consequences of Step 1.

We show below (*Step 1*) that for all  $t \geq 2$ , if

$$\|V_{t-1}^{1/2}(\hat{\theta}_{t-1} - \theta)\| \leq B_{t-1}(\delta t^{-2}) \quad \text{and} \quad \|\Gamma - \hat{\Gamma}_t\|_\infty \leq \gamma, \quad (15)$$

then

$$\forall p \in \mathcal{P}, \quad |\ell_{t,p} - \hat{\ell}_{t,p}| \leq \alpha_{t,p}. \quad (16)$$

Property (16), for those  $t$  for which it is satisfied, entails (*Step 2*) that the corresponding instantaneous regrets are bounded by

$$r_t \stackrel{\text{def}}{=} \ell_{t,p_t} - \min_{p \in \mathcal{P}} \ell_{t,p} \leq 2\alpha_{t,p_t}.$$

It only remains to deal (*Step 3*) with the rounds  $t$  when (16) does not hold; they account for the  $1 - \delta$  confidence level.

*Step 1: Good estimation of the losses.* When the two events (15) hold, we have

$$\begin{aligned} & |\ell_{t,p} - \hat{\ell}_{t,p}| \\ &= \left| (\phi(x_t, p)^\top \theta - c_t)^2 + p^\top \Gamma p \right. \\ & \quad \left. - \left( [\phi(x_t, p)^\top \hat{\theta}_{t-1}]_C - c_t \right)^2 + p^\top \hat{\Gamma}_t p \right| \\ &\leq |p^\top \Gamma p - p^\top \hat{\Gamma}_t p| \\ & \quad + \left| (\phi(x_t, p)^\top \theta - c_t)^2 - \left( [\phi(x_t, p)^\top \hat{\theta}_{t-1}]_C - c_t \right)^2 \right|. \end{aligned}$$

On the one hand,  $|p^\top \Gamma p - p^\top \hat{\Gamma}_t p| \leq \gamma$  while on the other hand,

$$\begin{aligned} & \left| (\phi(x_t, p)^\top \theta - c_t)^2 - \left( [\phi(x_t, p)^\top \hat{\theta}_{t-1}]_C - c_t \right)^2 \right| \\ &= \left| \phi(x_t, p)^\top \theta - [\phi(x_t, p)^\top \hat{\theta}_{t-1}]_C \right| \\ & \quad \times \left| \phi(x_t, p)^\top \theta + [\phi(x_t, p)^\top \hat{\theta}_{t-1}]_C - 2c_t \right|, \end{aligned}$$

where by the boundedness assumptions (5), all quantities in the final inequality lie in  $[0, C]$ , thus

$$\left| \phi(x_t, p)^\top \theta + [\phi(x_t, p)^\top \hat{\theta}_{t-1}]_C - 2c_t \right| \leq 2C.$$

Finally,

$$\begin{aligned} & \left| \phi(x_t, p)^\top \theta - [\phi(x_t, p)^\top \hat{\theta}_{t-1}]_C \right| \\ &\leq \left| \phi(x_t, p)^\top \theta - \phi(x_t, p)^\top \hat{\theta}_{t-1} \right| \\ &\leq \left\| V_{t-1}^{1/2}(\theta - \hat{\theta}_{t-1}) \right\| \left\| V_{t-1}^{-1/2} \phi(x_t, p) \right\|, \quad (17) \end{aligned}$$

where we used the Cauchy-Schwarz inequality for the second inequality, and the fact that  $|y - [x]_C| \leq |y - x|$  when  $y \in [0, C]$  and  $x \in \mathbb{R}$  for the first inequality. Collecting all bounds together, we proved

$$\begin{aligned} & \left| (\phi(x_t, p)^\top \theta - c_t)^2 - \left( [\phi(x_t, p)^\top \hat{\theta}_{t-1}]_C - c_t \right)^2 \right| \\ &\leq 2C \underbrace{\left\| V_{t-1}^{1/2}(\theta - \hat{\theta}_{t-1}) \right\|}_{\leq B_{t-1}(\delta t^{-2})} \left\| V_{t-1}^{-1/2} \phi(x_t, p) \right\|, \end{aligned}$$

but of course, this term is also bounded by the quantity  $L$  introduced in Section 3.5. This concludes the proof of the claimed inequality (16).

*Step 2: Resulting bound on the instantaneous regrets.* We denote by

$$p_t^* \in \arg \min_{p \in \mathcal{P}} \{\ell_{t,p} + p^\top \Gamma p\} \quad (18)$$

an optimal convex vector to be used at round  $t$ . By definition (3) of the optimistic algorithm, we have that the played  $p_t$  satisfies

$$\begin{aligned} & \hat{\ell}_{t,p_t} - \alpha_{t,p_t} \leq \hat{\ell}_{t,p_t^*} - \alpha_{t,p_t^*}, \\ \text{that is,} \quad & \hat{\ell}_{t,p_t} - \hat{\ell}_{t,p_t^*} \leq \alpha_{t,p_t} - \alpha_{t,p_t^*}. \end{aligned}$$

Now, for those  $t$  for which both events (15) hold, the property (16) also holds and yields, respectively for  $p = p_t$  and  $p = p_t^*$ :

$$\ell_{t,p_t} - \hat{\ell}_{t,p_t} \leq \alpha_{t,p_t} \quad \text{and} \quad \hat{\ell}_{t,p_t^*} - \ell_{t,p_t^*} \leq \alpha_{t,p_t^*}.$$

Combining all these three inequalities together, we proved

$$\begin{aligned} r_t &= \ell_{t,p_t} - \ell_{t,p_t^*} \\ &= (\ell_{t,p_t} - \hat{\ell}_{t,p_t}) + (\hat{\ell}_{t,p_t} - \hat{\ell}_{t,p_t^*}) + (\hat{\ell}_{t,p_t^*} - \ell_{t,p_t^*}) \\ &\leq \alpha_{t,p_t} + (\alpha_{t,p_t} - \alpha_{t,p_t^*}) + \alpha_{t,p_t^*} = 2\alpha_{t,p_t}, \end{aligned}$$

as claimed. This yields the  $2 \sum \alpha_{t,p_t}$  in the regret bound, where the sum is for  $t \geq n + 1$ .

*Step 3: Special cases.* We conclude the proof by dealing with the time steps  $t \geq n + 1$  when at least one of the events (15) does not hold. By a union bound, this happens for some  $t \geq n + 1$  with probability at most

$$\frac{\delta}{2} + \delta \sum_{t \geq n+1} t^{-2} \leq \frac{\delta}{2} + \delta \int_2^\infty \frac{1}{t^2} dt = \delta,$$

where we used  $n \geq 2$ . These special cases thus account for the claimed  $1 - \delta$  confidence level.

### C. Proof of Lemma 2

We derived the proof scheme below from scratch as we could find no suitable result in the literature for estimating  $\Gamma$  in our context.

We first consider the following auxiliary result.

**Lemma 4.** *Let  $n \geq 1$ . Assume that the common distribution of the  $\varepsilon_1, \varepsilon_2, \dots$  is  $\rho$ -sub-Gaussian. Then, no matter how the provider picks the  $p_t$ , we have, for all  $\delta \in (0, 1)$ , with probability at least  $1 - \delta$ ,*

$$\left\| \sum_{t=1}^n p_t p_t^\top (\widehat{\Gamma}_n - \Gamma) p_t p_t^\top \right\|_\infty \leq \kappa_n \sqrt{n},$$

where the quantities  $\kappa_n$ ,  $M_n$  and  $M'_n$  are defined as in Lemma 2:

$$\begin{aligned} M_n &\stackrel{\text{def}}{=} \rho/2 + \ln(6n/\delta) \\ M'_n &\stackrel{\text{def}}{=} M_n^2 \sqrt{2 \ln(3K^2/\delta)} + 2\sqrt{\exp(2\rho)\delta/6} \\ \kappa_n &\stackrel{\text{def}}{=} (C + 2M_n)B_n(\delta/3) + M'_n \end{aligned}$$

*Proof of Lemma 4.* We can show that  $\widehat{\Gamma}_n$  defined in (4) satisfies

$$\sum_{t=1}^n p_t p_t^\top \widehat{\Gamma}_n p_t p_t^\top = \sum_{t=1}^n \widehat{Z}_t^2 p_t p_t^\top, \quad (19)$$

where we recall that  $\widehat{Z}_t \stackrel{\text{def}}{=} Y_{t,p_t} - [\phi(x_t, p_t)^\top \widehat{\theta}_n]_C$ . Indeed, with,

$$\Phi(\widehat{\Gamma}) \stackrel{\text{def}}{=} \sum_{t=1}^n \left( \widehat{Z}_t^2 - p_t^\top \widehat{\Gamma} p_t \right)^2 = \sum_{t=1}^n \left( \widehat{Z}_t^2 - \text{Tr}(\widehat{\Gamma} p_t p_t^\top) \right)^2,$$

using  $\nabla_A \text{Tr}(AB) = B$ , we get

$$\nabla_{\widehat{\Gamma}} \Phi(\widehat{\Gamma}) = \sum_{t=1}^n 2p_t p_t^\top \left( \widehat{Z}_t^2 - p_t^\top \widehat{\Gamma} p_t \right),$$

which leads to (19) by canceling the gradient and keeping in mind that  $p_t^\top \widehat{\Gamma} p_t$  is a scalar value.

Let us denote

$$Z_t \stackrel{\text{def}}{=} Y_{t,p_t} - \phi(x_t, p_t)^\top \theta = p_t^\top \varepsilon_t$$

for all  $t \geq 1$ . To prove the lemma, we replace  $\widehat{\Gamma}_n$  by using (19) and apply a triangular inequality:

$$\begin{aligned} &\left\| \sum_{t=1}^n p_t p_t^\top (\widehat{\Gamma}_n - \Gamma) p_t p_t^\top \right\|_\infty \\ &\leq \left\| \sum_{t=1}^n (\widehat{Z}_t^2 - Z_t^2) p_t p_t^\top \right\|_\infty + \left\| \sum_{t=1}^n Z_t^2 p_t p_t^\top - p_t p_t^\top \Gamma p_t p_t^\top \right\|_\infty \end{aligned} \quad (20)$$

We will consecutively provide bounds for each of the two terms in the right-hand side of the above inequality, each

holding with probability at least  $1 - \delta/3$ . To do so, we focus on the event defined below where all  $Z_t$  are bounded:

$$\mathcal{E}_n(\delta) \stackrel{\text{def}}{=} \{ \forall t = 1, \dots, n, \quad |Z_t| \leq M_n \}, \quad (21)$$

with  $M_n$  defined in the statement of the lemma. We will show below that  $\mathcal{E}_n(\delta)$  takes place with probability at least  $1 - \delta/3$ . All in all, our obtained global bound will hold with probability at least  $1 - \delta$ , as stated in the lemma.

*Bounding the probability of the event  $\mathcal{E}_n(\delta)$ .* Recall that  $p_t$  is  $\mathcal{F}_{t-1} = \sigma(\varepsilon_1, \dots, \varepsilon_{t-1})$  measurable. For  $t \in \{1, \dots, n\}$ , as  $\varepsilon_t$  is a  $\rho$ -sub-Gaussian variable independent of  $\mathcal{F}_{t-1}$ ,

$$\mathbb{E} \left[ \exp(p_t^\top \varepsilon_t) \mid \mathcal{F}_{t-1} \right] \leq \exp \left( \frac{\rho \|p_t\|^2}{2} \right) \leq \exp \left( \frac{\rho}{2} \right);$$

see Footnote 1 for a reminder of the definition of a  $\rho$ -sub-Gaussian variable. Using the Markov-Chernov inequality, we obtain

$$\begin{aligned} \mathbb{P}(Z_t \geq M_n \mid \mathcal{F}_{t-1}) &\leq \mathbb{E} \left[ \exp(Z_t) \mid \mathcal{F}_{t-1} \right] \exp(-M_n) \\ &\leq \exp \left( \frac{\rho}{2} - M_n \right) = \frac{\delta}{6n}. \end{aligned} \quad (22)$$

Symmetrically, we get that  $\mathbb{P}(Z_t \leq -M_n) \leq \delta/6n$ . Combining all these bounds for  $t = 1, \dots, n$ , the event  $\mathcal{E}_n(\delta)$  happens with probability at least  $1 - \delta/3$ .

*Upper bound on the first term in (20).* By Assumption (5), we have  $\phi(x_t, p_t)^\top \theta \in [0, C]$ , thus

$$|\widehat{Z}_t - Z_t| = \left| \phi(x_t, p_t)^\top \theta - [\phi(x_t, p_t)^\top \widehat{\theta}_n]_C \right| \leq C,$$

and therefore, on  $\mathcal{E}_n(\delta)$ ,

$$|\widehat{Z}_t + Z_t| \leq |\widehat{Z}_t - Z_t| + |2Z_t| \leq C + 2M_n \stackrel{\text{def}}{=} M_n''.$$

Noting that all components of  $p_t p_t^\top$  are upper bounded by 1,

$$\begin{aligned} &\left\| \sum_{t=1}^n (\widehat{Z}_t^2 - Z_t^2) p_t p_t^\top \right\|_\infty \leq \sum_{t=1}^n |\widehat{Z}_t^2 - Z_t^2| \\ &= \sum_{t=1}^n |(\widehat{Z}_t - Z_t)(\widehat{Z}_t + Z_t)| \\ &\leq M_n'' \sqrt{n \sum_{t=1}^n (\widehat{Z}_t - Z_t)^2}, \end{aligned}$$

where the last inequality was obtained by  $|\widehat{Z}_t + Z_t| \leq M_n''$  together with the Cauchy-Schwarz inequality. Using that  $|y - [x]_C| \leq |y - x|$  when  $y \in [0, C]$  and  $x \in \mathbb{R}$ , we note that

$$|\widehat{Z}_t - Z_t| \leq \left| \phi(x_t, p_t)^\top (\widehat{\theta}_n - \theta) \right|.$$

All in all, we proved so far

$$\begin{aligned}
 & \left\| \sum_{t=1}^n (\widehat{Z}_t^2 - Z_t^2) p_t p_t^\top \right\|_\infty \\
 & \leq M_n'' \sqrt{n(\widehat{\theta}_n - \theta)^\top \left( \sum_{t=1}^n \phi(x_t, p_t) \phi(x_t, p_t)^\top \right) (\widehat{\theta}_n - \theta)} \\
 & = M_n'' \sqrt{n(\widehat{\theta}_n - \theta)^\top (V_n - \lambda I) (\widehat{\theta}_n - \theta)} \\
 & \leq M_n'' \sqrt{n(\widehat{\theta}_n - \theta)^\top V_n (\widehat{\theta}_n - \theta)} \\
 & = M_n'' \|V_n^{1/2}(\theta - \widehat{\theta}_n)\| \sqrt{n},
 \end{aligned}$$

where  $V_n = \lambda I + \sum_{t=1}^n \phi(x_t, p_t) \phi(x_t, p_t)^\top$  was used for the last steps.

From Lemma 1 and the bound (6), we finally obtain that with probability at least  $1 - \delta/3$ ,

$$\begin{aligned}
 \left\| \sum_{t=1}^n (\widehat{Z}_t^2 - Z_t^2) p_t p_t^\top \right\|_\infty & \leq M_n'' B_n(\delta/3) \sqrt{n} \quad (23) \\
 & = (C + 2M_n) B_n(\delta/3) \sqrt{n}. \quad (24)
 \end{aligned}$$

*Upper bound on the second term in (20).* Recall that  $p_t$  is  $\mathcal{F}_{t-1}$  measurable and that in Model 1, we defined  $Z_t = Y_{t,p_t} - \phi(x_t, p_t)^\top \theta = p_t^\top \varepsilon_t$ , which is a scalar value. These two observations yield

$$\begin{aligned}
 \mathbb{E}[Z_t^2 p_t p_t^\top \mid \mathcal{F}_{t-1}] & = \mathbb{E}[p_t Z_t^2 p_t^\top \mid \mathcal{F}_{t-1}] \\
 & = \mathbb{E}[p_t p_t^\top \varepsilon_t \varepsilon_t^\top p_t p_t^\top \mid \mathcal{F}_{t-1}] \\
 & = p_t p_t^\top \mathbb{E}[\varepsilon_t \varepsilon_t^\top \mid \mathcal{F}_{t-1}] p_t p_t^\top = p_t p_t^\top \Gamma p_t p_t^\top. \quad (25)
 \end{aligned}$$

We wish to apply the Hoeffding–Azuma inequality to each component of  $Z_t^2 p_t p_t^\top$ , however, we need some boundedness to do so. Therefore, we consider instead  $Z_t^2 \mathbf{1}_{\{|Z_t| \leq M_n\}}$ . The indicated inequality, together with a union bound, entails that with probability at least  $1 - \delta/3$ ,

$$\begin{aligned}
 & \left\| \sum_{t=1}^n Z_t^2 \mathbf{1}_{\{|Z_t| \leq M_n\}} p_t p_t^\top \right. \\
 & \quad \left. - \sum_{t=1}^n \mathbb{E}[Z_t^2 \mathbf{1}_{\{|Z_t| \leq M_n\}} p_t p_t^\top \mid \mathcal{F}_{t-1}] \right\|_\infty \\
 & \leq M_n^2 \sqrt{2n \ln(3K^2/\delta)}. \quad (26)
 \end{aligned}$$

Over  $\mathcal{E}_n(\delta)$ , using (25) and applying a triangular inequality,

we obtain

$$\begin{aligned}
 & \left\| \sum_{t=1}^n Z_t^2 p_t p_t^\top - p_t p_t^\top \Gamma p_t p_t^\top \right\|_\infty \\
 & = \left\| \sum_{t=1}^n Z_t^2 \mathbf{1}_{\{|Z_t| \leq M_n\}} p_t p_t^\top - \sum_{t=1}^n \mathbb{E}[Z_t^2 p_t p_t^\top \mid \mathcal{F}_{t-1}] \right\|_\infty \\
 & \leq \left\| \sum_{t=1}^n Z_t^2 \mathbf{1}_{\{|Z_t| \leq M_n\}} p_t p_t^\top \right. \\
 & \quad \left. - \sum_{t=1}^n \mathbb{E}[Z_t^2 p_t p_t^\top \mathbf{1}_{\{|Z_t| \leq M_n\}} \mid \mathcal{F}_{t-1}] \right\|_\infty \\
 & \quad + \sum_{t=1}^n \left\| \mathbb{E}[Z_t^2 p_t p_t^\top \mathbf{1}_{\{|Z_t| > M_n\}} \mid \mathcal{F}_{t-1}] \right\|_\infty. \quad (27)
 \end{aligned}$$

We just need to bound the last term of the inequality above to conclude this part. Using that  $x^2 \leq \exp(x)$  for  $x \geq 0$ , we get

$$\begin{aligned}
 & \mathbb{E}[Z_t^2 \mathbf{1}_{\{|Z_t| > M_n\}} \mid \mathcal{F}_{t-1}] \\
 & \leq \mathbb{E}[\exp(|Z_t|) \mathbf{1}_{\{|Z_t| > M_n\}} \mid \mathcal{F}_{t-1}].
 \end{aligned}$$

Applying a conditional Cauchy-Schwarz inequality yields

$$\begin{aligned}
 & \mathbb{E}[\exp(|Z_t|) \mathbf{1}_{\{|Z_t| > M_n\}} \mid \mathcal{F}_{t-1}] \\
 & \leq \sqrt{\mathbb{E}[\exp(2|Z_t|) \mid \mathcal{F}_{t-1}] \mathbb{E}[\mathbf{1}_{\{|Z_t| > M_n\}} \mid \mathcal{F}_{t-1}]}.
 \end{aligned}$$

Now, thanks to the sub-Gaussian property of  $\varepsilon_t$  used with  $\nu = 2p_t$  and  $\nu = -2p_t$ , we have

$$\begin{aligned}
 & \mathbb{E}[\exp(2|Z_t|)] \\
 & \leq \mathbb{E}[\exp(2Z_t) \mid \mathcal{F}_{t-1}] + \mathbb{E}[\exp(-2Z_t) \mid \mathcal{F}_{t-1}] \\
 & \leq 2 \exp(2\rho).
 \end{aligned}$$

The bound (22) and its symmetric version indicate that

$$\mathbb{P}(|Z_t| \geq M_n \mid \mathcal{F}_{t-1}) \leq \frac{\delta}{3n}.$$

We therefore proved

$$\mathbb{E}[\exp(|Z_t|) \mathbf{1}_{\{|Z_t| > M_n\}} \mid \mathcal{F}_{t-1}] \leq \sqrt{2 \exp(2\rho) \frac{\delta}{3n}}.$$

Thus, we have  $\mathbb{E}[Z_t^2 \mathbf{1}_{\{|Z_t| > M_n\}} \mid \mathcal{F}_{t-1}] \leq 2\sqrt{\exp(2\rho)\delta/(6n)}$  and as all components of the  $p_t p_t^\top$  are in  $[0, 1]$ ,

$$\left\| \mathbb{E}[Z_t^2 \mathbf{1}_{\{|Z_t| > M_n\}} p_t p_t^\top \mid \mathcal{F}_{t-1}] \right\|_\infty \leq 2\sqrt{\exp(2\rho) \frac{\delta}{6n}}. \quad (28)$$

Finally, combining (27) with (26) and (28), we get with probability  $1 - \delta/3$

$$\begin{aligned}
 & \left\| \sum_{t=1}^n Z_t^2 p_t p_t^\top - p_t p_t^\top \Gamma p_t p_t^\top \right\|_\infty \\
 & \leq M_n^2 \sqrt{2n \ln(3K^2/\delta)} + 2n \sqrt{\exp(2\rho)\delta/(6n)} = M_n' \sqrt{n},
 \end{aligned}$$

where  $M'_n$  is defined in the statement of the lemma.

Combining the two upper bounds into (20). Combining the above upper bound with (20) and (24), we proved that with probability  $1 - \delta$ ,

$$\left\| \sum_{t=1}^n p_t p_t^\top (\widehat{\Gamma}_n - \Gamma) p_t p_t^\top \right\|_\infty \leq M'_n \sqrt{n} + M''_n B_n (\delta/3) \sqrt{n},$$

which concludes the proof.  $\square$

## Conclusion of the proof of Lemma 2

Remember from Section 3.3 that all vectors  $p^{(i,j)}$  are played at least  $n_0$  times in the  $n$  exploration rounds.

*Proof of Lemma 2.* Applying Lemma 4 together with

$$\begin{aligned} p_t p_t^\top (\widehat{\Gamma}_n - \Gamma) p_t p_t^\top &= p_t \text{Tr} \left( p_t^\top (\widehat{\Gamma}_n - \Gamma) p_t \right) p_t^\top \\ &= \text{Tr} \left( (\widehat{\Gamma}_n - \Gamma) p_t p_t^\top \right) p_t p_t^\top \end{aligned} \quad (29)$$

we have, with probability at least  $1 - \delta$ , that for all pairs of coordinates  $(i, j) \in E$ ,

$$\left| \sum_{t=1}^n \text{Tr} \left( (\widehat{\Gamma}_n - \Gamma) p_t p_t^\top \right) [p_t p_t^\top]_{i,j} \right| \leq \kappa_n \sqrt{n}. \quad (30)$$

Remember that in the set  $E$  considered in Section 3.3, we only have pairs  $(i, j)$  with  $i \leq j$ . However, for symmetry reasons, it will be convenient to also consider the vectors  $p^{(i,j)}$  with  $i > j$ , where the latter vectors are defined in an obvious way. We note that for all  $1 \leq i, j \leq K$ ,

$$p^{(i,j)} p^{(i,j)\top} = p^{(j,i)} p^{(j,i)\top}. \quad (31)$$

Now, our aim is to control

$$\left| q^\top (\widehat{\Gamma}_n - \Gamma) q \right| = \left| \text{Tr} \left( (\widehat{\Gamma}_n - \Gamma) q q^\top \right) \right| \quad (32)$$

uniformly over  $q \in \mathcal{P}$ . The proof consists of two steps: establishing such a control for the special cases where  $q$  is one of the  $p^{(i,j)}$  and then, extending the control to arbitrary vectors  $q \in \mathcal{P}$ , based on a decomposition of  $q q^\top$  as a weighted sum of  $p^{(i,j)} p^{(i,j)\top}$  vectors.

*Part 1: The case of the  $p^{(i,j)}$  vectors.* Consider first the off-diagonal elements  $1 \leq i < j \leq K$ . Note that since  $p_t$  is of the form  $p^{(i',j')}$  for all  $1 \leq t \leq n$ , we have

$$[p_t p_t^\top]_{i,j} = \begin{cases} 1/4 & \text{if } p_t = p^{(i,j)}, \\ 0 & \text{otherwise.} \end{cases} \quad (33)$$

Using that  $p_t = p^{(i,j)}$  at least for  $n_0$  rounds, Inequality (30) entails

$$\frac{n_0}{4} \left| \text{Tr} \left( (\widehat{\Gamma}_n - \Gamma) p^{(i,j)} p^{(i,j)\top} \right) \right| \leq \kappa_n \sqrt{n},$$

or put differently,

$$\left| \text{Tr} \left( (\widehat{\Gamma}_n - \Gamma) p^{(i,j)} p^{(i,j)\top} \right) \right| \leq \frac{4\kappa_n \sqrt{n}}{n_0}. \quad (34)$$

Now, let us consider the diagonal elements. Let  $1 \leq i \leq K$ . We have

$$[p_t p_t^\top]_{i,i} = \begin{cases} 1 & \text{if } p_t = p^{(i,i)}, \\ 1/4 & \text{if } p_t = p^{(i,j)} \text{ for some } j > i, \\ 1/4 & \text{if } p_t = p^{(k,i)} \text{ for some } k < i, \\ 0 & \text{otherwise,} \end{cases} \quad (35)$$

where we recall that the  $p_t$  are necessarily of the form  $p^{(k,\ell)}$  with  $k \leq \ell$ . Therefore, Inequality (30) yields

$$\begin{aligned} n_0 \left| \text{Tr} \left( (\widehat{\Gamma}_n - \Gamma) \left( p^{(i,i)} p^{(i,i)\top} + \frac{1}{4} \sum_{j>i} p^{(i,j)} p^{(i,j)\top} \right. \right. \right. \\ \left. \left. \left. + \frac{1}{4} \sum_{k<i} p^{(k,i)} p^{(k,i)\top} \right) \right) \right| \leq \kappa_n \sqrt{n}, \end{aligned}$$

which we rewrite by symmetry—see (31)—as

$$\begin{aligned} \left| \text{Tr} \left( (\widehat{\Gamma}_n - \Gamma) \left( p^{(i,i)} p^{(i,i)\top} + \frac{1}{4} \sum_{j \neq i} p^{(i,j)} p^{(i,j)\top} \right) \right) \right| \\ \leq \frac{\kappa_n \sqrt{n}}{n_0}. \end{aligned} \quad (36)$$

*Part 2-1: Decomposing arbitrary vectors  $q \in \mathcal{P}$ .* Now, let  $q \in \mathcal{P}$ . We show below by means of elementary calculations that

$$q q^\top = \sum_{i=1}^K \sum_{j=1}^K u(i, j) p^{(i,j)} p^{(i,j)\top} \quad (37)$$

with  $u(i, j) = 2q_i q_j$  if  $i \neq j$  and  $u(i, i) = 2q_i^2 - q_i$ .

Indeed, by identification and by imposing  $u(i, j) = u(j, i)$  for all pairs  $i, j$ , the equalities (33) and the symmetry property (31) entail, for  $k \neq k'$ :

$$\begin{aligned} q_k q_{k'} &= [q q^\top]_{k,k'} = \sum_{i=1}^K \sum_{j=1}^K u(i, j) [p^{(i,j)} p^{(i,j)\top}]_{k,k'} \\ &= \frac{u(k, k')}{4} + \frac{u(k', k)}{4} = \frac{u(k, k')}{2}, \end{aligned}$$

which can be rephrased as  $u(k, k') = u(k', k) = 2q_k q_{k'}$ . Now, let us calculate the diagonal elements, by identification and by the equalities (35) as well as by the symmetry

property (31):

$$\begin{aligned}
 q_k^2 &= [qq^T]_{k,k} = \sum_{i=1}^K \sum_{j=1}^K u(i,j) [p^{(i,j)} p^{(i,j)T}]_{k,k} \\
 &= u(k,k) + \sum_{i \neq k} \frac{u(i,k)}{4} + \sum_{j \neq k} \frac{u(k,j)}{4} \\
 &= u(k,k) + \frac{1}{2} \sum_{i \neq k} u(i,k) = u(k,k) + \sum_{i \neq k} q_k q_i \\
 &= u(k,k) + \sum_{i=1}^K q_k q_i - q_k^2 = u(k,k) + q_k - q_k^2,
 \end{aligned}$$

which leads to  $u(k,k) = 2q_k^2 - q_k$ .

We introduce the notation

$$P^{(i,j)} = p^{(i,j)} p^{(i,j)T}$$

and in light of (34) and (36), we rewrite (37) as

$$\begin{aligned}
 qq^T &= \sum_{i=1}^K u(i,i) \left( P^{(i,i)} + \frac{1}{4} \sum_{j \neq i} P^{(i,j)} \right) \\
 &\quad + \sum_{i=1}^K \sum_{j \neq i} \left( u(i,j) - \frac{u(i,i)}{4} \right) P^{(i,j)}.
 \end{aligned}$$

*Part 2-2: Controlling arbitrary vectors  $q \in \mathcal{P}$ .* Therefore, substituting this decomposition of  $qq^T$  into the aim (32), and using the linearity of the trace as well as the triangle inequality for absolute values, we obtain

$$\begin{aligned}
 |q^T (\widehat{\Gamma}_n - \Gamma) q| &= \left| \text{Tr} \left( (\widehat{\Gamma}_n - \Gamma) qq^T \right) \right| \\
 &\leq \sum_{i=1}^K |u(i,i)| \left| \text{Tr} \left( (\widehat{\Gamma}_n - \Gamma) \left( P^{(i,i)} + \frac{1}{4} \sum_{j \neq i} P^{(i,j)} \right) \right) \right| \\
 &\quad + \sum_{i=1}^K \sum_{j \neq i} \left| u(i,j) - \frac{u(i,i)}{4} \right| \left| \text{Tr} \left( (\widehat{\Gamma}_n - \Gamma) P^{(i,j)} \right) \right|
 \end{aligned}$$

We then substitute the upper bounds (34) and (36) and get

$$\begin{aligned}
 &|q^T (\widehat{\Gamma}_n - \Gamma) q| \\
 &\leq \frac{\kappa_n \sqrt{n}}{n_0} \left( \sum_{i=1}^K |u(i,i)| + 4 \sum_{i=1}^K \sum_{j \neq i} \left| u(i,j) - \frac{u(i,i)}{4} \right| \right).
 \end{aligned}$$

By the triangle inequality, by the values  $2q_i q_j$  of the coeffi-

cients  $u(i,j)$  when  $i \neq j$  and by using  $|u(i,i)| \leq q_i$ ,

$$\begin{aligned}
 &\sum_{i=1}^K |u(i,i)| + 4 \sum_{i=1}^K \sum_{j \neq i} \left| u(i,j) - \frac{u(i,i)}{4} \right| \\
 &\leq K \sum_{i=1}^K |u(i,i)| + 4 \sum_{i=1}^K \sum_{j \neq i} |u(i,j)| \\
 &\leq K \sum_{i=1}^K q_i + 8 \sum_{i=1}^K \sum_{j \neq i} q_i q_j \\
 &= K + 8 \sum_{i=1}^K q_i (1 - q_i) \leq K + 8.
 \end{aligned}$$

Putting all elements together, we proved

$$\sup_{q \in \mathcal{P}} |q^T (\widehat{\Gamma}_n - \Gamma) q| \leq \frac{\kappa_n \sqrt{n}}{n_0} (K + 8),$$

which concludes the proof of Lemma 2.  $\square$

## D. Proof of Lemma 3

We recall that this lemma is a straightforward adaptation/generalization of Lemma 19.1 of the monograph by [Lattimore & Szepesvári \(2018\)](#); see also a similar result in Lemma 3 by [Chu et al. \(2011\)](#).

We consider the worst case when all summations would start at  $n + 1 = 2$ .

By definition, the quantity  $\bar{B}$  upper bounds all the  $B_{t-1}(\delta t^{-2})$ . It therefore suffices to upper bound

$$\begin{aligned} & \sum_{t=2}^T \min \left\{ L, 2C\bar{B} \left\| V_{t-1}^{-1/2} \phi(x_t, p_t) \right\| \right\} \\ & \leq \sqrt{T} \sqrt{\sum_{t=2}^T \min \left\{ L^2, (2C\bar{B})^2 \left\| V_{t-1}^{-1/2} \phi(x_t, p_t) \right\|^2 \right\}} \\ & = \sqrt{T} \sqrt{\sum_{t=2}^T \min \left\{ L^2, (2C\bar{B})^2 \left( \frac{\det(V_t)}{\det(V_{t-1})} - 1 \right) \right\}} \end{aligned}$$

where we applied first the Cauchy-Schwarz inequality and used second the equality

$$\begin{aligned} 1 + \left\| V_{t-1}^{-1/2} \phi(x_t, p_t) \right\|^2 \\ = 1 + \phi(x_t, p_t)^T V_{t-1}^{-1} \phi(x_t, p_t) = \frac{\det(V_t)}{\det(V_{t-1})}, \end{aligned}$$

that follows from a standard result in online matrix theory, namely, Lemma 5 below.

Now, we get a telescoping sum with the logarithm function by using the inequality

$$\forall b > 0, \quad \forall u > 0, \quad \min\{b, u\} \leq b \frac{\ln(1+u)}{\ln(1+b)}, \quad (38)$$

which is proved below. Namely, we further bound the sum above by

$$\begin{aligned} & \sum_{t=2}^T \min \left\{ L^2, (2C\bar{B})^2 \left( \frac{\det(V_t)}{\det(V_{t-1})} - 1 \right) \right\} \\ & \leq (2C\bar{B})^2 \sum_{t=2}^T \min \left\{ \frac{L^2}{(2C\bar{B})^2}, \frac{\det(V_t)}{\det(V_{t-1})} - 1 \right\} \\ & \leq (2C\bar{B})^2 \sum_{t=2}^T \frac{L^2/(2C\bar{B})^2}{\ln\left(1 + L^2/(2C\bar{B})^2\right)} \ln\left(\frac{\det(V_t)}{\det(V_{t-1})}\right) \\ & = \frac{L^2}{\ln\left(1 + L^2/(2C\bar{B})^2\right)} \ln\left(\frac{\det(V_T)}{\det(V_2)}\right) \\ & \leq \frac{L^2}{\ln\left(1 + L^2/(2C\bar{B})^2\right)} d \ln \frac{\lambda + T}{\lambda} \end{aligned}$$

where we used (5) and one of its consequences to get the last inequality.

Finally, we use  $1/\ln(1+u) \leq 1/u + 1/2$  for all  $u \geq 0$  to get a more readable constant:

$$\frac{L^2}{\ln\left(1 + L^2/(2C\bar{B})^2\right)} \leq (2C\bar{B})^2 + \frac{L^2}{2}.$$

The proof is concluded by collecting all pieces.  $\square$

Finally, we now provide the proofs of two either straightforward or standard results used above.

### D.1. A Standard Result in Online Matrix Theory

The following result is extremely standard in online matrix theory (see, among many others, Lemma 11.11 in [Cesa-Bianchi & Lugosi, 2006](#) or the proof of Lemma 19.1 in the monograph by [Lattimore & Szepesvári, 2018](#)).

**Lemma 5.** *Let  $M$  a  $d \times d$  full-rank matrix, let  $u, v \in \mathbb{R}^d$  be two arbitrary vectors. Then*

$$1 + v^T M^{-1} u = \frac{\det(M + uv^T)}{\det(M)}.$$

The proof first considers the case  $M = I_d$ . We are then left with showing that  $\det(I_d + uv^T) = 1 + v^T u$ , which follows from taking the determinant of every term of the equality

$$\begin{aligned} & \begin{bmatrix} I_d & 0 \\ v^T & 1 \end{bmatrix} \begin{bmatrix} I_d + uv^T & u \\ 0 & 1 \end{bmatrix} \begin{bmatrix} I_d & 0 \\ -v^T & 1 \end{bmatrix} \\ & = \begin{bmatrix} I_d & u \\ 0 & 1 + v^T u \end{bmatrix}. \end{aligned}$$

Now, we can reduce the case of a general  $M$  to this simpler case by noting that

$$\begin{aligned} \det(M + uv^T) &= \det(M) \det\left(I_d + (M^{-1}u)v^T\right) \\ &= \det(M) (1 + v^T M^{-1}u). \end{aligned}$$

### D.2. Proof of Inequality (38)

This inequality is used in Lemma 19.1 of the monograph by [Lattimore & Szepesvári \(2018\)](#), in the special case  $b = 1$ . The extension to  $b > 0$  is straightforward.

We fix  $b > 0$ . We want to prove that

$$\forall u > 0, \quad \min\{b, u\} \leq b \frac{\ln(1+u)}{\ln(1+b)}. \quad (39)$$

We first note that

$$\min\{b, u\} = b \frac{\ln(1+u)}{\ln(1+b)} \quad \text{for } u = b$$



and that  $\min\{b, u\} = b$  for  $u \geq b$ , with the right-hand side of (39) being an increasing function of  $u$ . Therefore, it suffices to prove (39) for  $u \in [0, b]$ , where  $\min\{b, u\} = u$ . Now,

$$u \mapsto b \frac{\ln(1+u)}{\ln(1+b)} - u$$

is a concave and (twice) differentiable function, vanishing at  $u = 0$  and  $u = b$ , and is therefore non-negative on  $[0, b]$ . This concludes the proof.

## E. Proof of Theorem 2

**Comment:** The key observation lies in Step 1 (and is tagged as such); the rest is standard maths.

Because of the expression for the expected losses (8) and the consequence (10) of attainability, the regret can be rewritten as

$$R_T = \sum_{t=1}^T \ell_{t,p_t} = \sum_{t=1}^T (\phi(x_t, p_t)^\top \theta - c_t)^2.$$

We first successively prove (*Step 1*) that for  $t \geq 2$ , if the bound of Lemma 1 holds, namely,

$$\left\| V_{t-1}^{1/2} (\theta - \hat{\theta}_{t-1}) \right\| \leq B_{t-1} (\delta t^{-2}), \quad (40)$$

then

$$\ell_{t,p_t} \leq 2\beta_{t,p_t} + 2\tilde{\ell}_{t,p_t}, \quad (41)$$

$$\tilde{\ell}_{t,p_t} \leq \beta_{t,p_t} + \tilde{\ell}_{t,p_t^*} - \beta_{t,p_t^*}, \quad (42)$$

$$\tilde{\ell}_{t,p_t^*} \leq \beta_{t,p_t^*}. \quad (43)$$

These inequalities collectively entail the bound  $\ell_{t,p_t} \leq 4\beta_{t,p_t}$ . Of course, because of the boundedness assumptions (5), we also have  $\ell_{t,p_t} \leq C^2$ . It then suffices to bound the sum (*Step 2*) of the  $\ell_{t,p_t}$  by the sum of the  $\min\{C^2, 4\beta_{t,p_t}\}$  and control for the probability of (40).

*Step 1: Proof of (41)–(43).* Inequality (42) holds by definition of the algorithm. For (43) and (41), we re-use the inequality (17) proved earlier: for all  $p \in \mathcal{P}$ ,

$$\begin{aligned} & \left( \phi(x_t, p)^\top (\theta - \hat{\theta}_{t-1}) \right)^2 \\ & \leq \left\| V_{t-1}^{1/2} (\theta - \hat{\theta}_{t-1}) \right\|^2 \left\| V_{t-1}^{-1/2} \phi(x_t, p) \right\|^2 \end{aligned} \quad (44)$$

$$\leq B_{t-1} (\delta t^{-2})^2 \left\| V_{t-1}^{-1/2} \phi(x_t, p) \right\|^2 \stackrel{\text{def}}{=} \beta_{t,p}, \quad (45)$$

where we used the bound (40) for the last inequality. This inequality directly yields (43) by taking  $p = p_t^*$ .

Now comes the specific improvement and our key observation: using that  $(u+v)^2 \leq 2u^2 + 2v^2$ , we have

$$\begin{aligned} \ell_{t,p_t} &= \left( \phi(x_t, p_t)^\top \theta - \phi(x_t, p_t)^\top \hat{\theta}_{t-1} \right. \\ & \quad \left. + \phi(x_t, p_t)^\top \hat{\theta}_{t-1} - c_t \right)^2 \\ &\leq 2 \left( \phi(x_t, p_t)^\top \theta - \phi(x_t, p_t)^\top \hat{\theta}_{t-1} \right)^2 \\ & \quad + 2 \underbrace{\left( \phi(x_t, p_t)^\top \hat{\theta}_{t-1} - c_t \right)^2}_{=\tilde{\ell}_{t,p_t}}, \end{aligned}$$

which yields (41) via (45) used with  $p = p_t$ .

*Step 2: Summing the bounds.* First, the bound (40) holds, by Lemma 1, with probability at least  $1 - \delta t^{-2}$  for a given  $t \geq 2$ .

By a union bound, it holds for all  $t \geq 2$  with probability at least  $1 - \delta$ . By bounding  $\ell_{t,p_t}$  by  $C^2$  and the  $B_{t-1}(\delta t^{-2})$  by  $\bar{B}$ , we therefore get, from Step 1, that with probability at least  $1 - \delta$ ,

$$\bar{R}_T \leq C^2 + \sum_{t=2}^T \min\left\{C^2, 4\bar{B}^2 \|V_{t-1}^{-1/2} \phi(x_t, p)\|^2\right\}.$$

Now, as in the proof of Lemma 3 above (Appendix D),

$$\begin{aligned} & \sum_{t=2}^T \min\left\{C^2, 4\bar{B}^2 \|V_{t-1}^{-1/2} \phi(x_t, p)\|^2\right\} \\ &= \sum_{t=2}^T \min\left\{C^2, 4\bar{B}^2 \left(\frac{\det(V_T)}{\det(V_1)} - 1\right)\right\} \\ &\leq 4\bar{B}^2 \sum_{t=2}^T \frac{C^2/(4\bar{B}^2)}{\ln\left(1 + C^2/(4\bar{B}^2)\right)} \ln\left(\frac{\det(V_t)}{\det(V_{t-1})}\right) \\ &= \frac{C^2}{\ln\left(1 + C^2/(4\bar{B}^2)\right)} \ln\left(\frac{\det(V_T)}{\det(V_1)}\right) \\ &\leq \left(4\bar{B}^2 + \frac{C^2}{2}\right) d \ln \frac{\lambda + T}{\lambda}. \end{aligned}$$

This concludes the proof.

## F. Numerical expression of the covariance matrix $\Gamma$ built on data

The covariance matrix  $\Gamma$  was built based on historical data as indicated in Section 5.1. Namely, we considered the time series of residuals associated with our estimation of the consumption. The diagonal coefficients  $\Gamma_{j,j}$  were given by the empirical variance of the residuals associated with tariff  $j$ , while non-diagonal coefficients  $\Gamma_{j,j'}$  were given by the empirical covariance between residuals of tariffs  $j$  and  $j'$  at times  $t$  and  $t \pm 48$ . (A more realistic model might consider a noise which depends on the half-hour of the day).

**Numerical expression obtained.** More precisely, the variance terms  $\Gamma_{1,1}$ ,  $\Gamma_{2,2}$ , and  $\Gamma_{3,3}$  were computed with respectively 788, 15 072 and 1 660 observations, while the non-diagonal coefficients were based on fewer observations: 1 318 for  $\Gamma_{2,3}$  and 620 for  $\Gamma_{1,2}$ , but only 96 for  $\Gamma_{1,3}$ . The resulting matrix  $\Gamma$  is

$$\Gamma = \sigma^2 \begin{pmatrix} 1.11 & 0.46 & 0.04 \\ 0.46 & 1.00 & 0.56 \\ 0.04 & 0.56 & 2.07 \end{pmatrix} \quad \text{with } \sigma = 0.02.$$

To get an idea of the orders of magnitude at stake, we indicate that in the data set considered, the mean consumption remained between 0.08 and 0.21 kWh per half-hour and that its empirical average equals 0.46.

**Off-diagonal coefficients are non-zero.** We may test, for each  $j \neq j'$ , the null hypothesis  $\Gamma_{j,j'} = 0$  using the Pearson correlation test; we obtain low p-values (smaller than something of the order of  $10^{-13}$ ), which shows that  $\Gamma$  is significantly different from a diagonal matrix. We may conduct a similar study to show that it is not proportional to the all-ones matrix, nor to any matrix with a special form.
